# Supplementary material for: Non-symmetric thieno[3,2-b]thiophene-fused BODIPYs: synthesis, spectroscopic properties and providing a functional strategy for NIR probes
Source: Royal Society of Chemistry journal article supplement (doi:10.1039/c9qo01190k), 2019-01-01

# **Non-symmetric thieno[3, 2-b]thiophene-fused BODIPYs: Synthesis, Spectroscopic properties and providing a functional strategy for NIR probes**

Yijuan Sun,<sup>a</sup> Hao Yuan,<sup>b</sup> Linting Di,<sup>a</sup> Zhikuan Zhou,<sup>a</sup> Lizhi Gai,<sup>\*a, b</sup> Xuqiong Xiao,<sup>a</sup>  
Weijiang He<sup>b</sup> and Hua Lu<sup>\*a</sup>

*a. Key Laboratory of Organosilicon Chemistry and Material Technology of Ministry of Education, and Key Laboratory of Organosilicon Material Technology of Zhejiang Province, Hangzhou Normal University, No. 2318, Yuhangtang Road, Hangzhou 311121, P. R. China. Email: lizhigai@hznu.edu.cn; hualu@hznu.edu.cn.*

*b. State Key Laboratory of Coordination Chemistry, Nanjing National Laboratory of Microstructures, Nanjing University, Nanjing, 210093, P. R China*

## **Supporting Information**

### **Content**

|                                                     |     |
|-----------------------------------------------------|-----|
| Experimental Details .....                          | S2  |
| Spectroscopic measurements .....                    | S3  |
| Photostability.....                                 | S5  |
| The sensing properties of compounds 8.....          | S6  |
| <sup>1</sup> H and <sup>13</sup> C NMR spectra..... | S7  |
| HRMS-ESI spectra .....                              | S13 |

## Experimental Details

All reagents come from commercial suppliers and are not further purified for use unless otherwise specified.  $\text{CH}_2\text{Cl}_2$  was distilled with calcium hydride. THF and toluene were dried and distilled with sodium metal.  $^1\text{H}$  NMR,  $^{13}\text{C}$  NMR spectra were obtained using a Bruker DRX400 spectrometer and referenced to the residual proton signals of the solvent. HR-MS were obtained by a Bruker Daltonics microTOF-Q II spectrometer. All the solvents employed for the spectroscopic measurements were of UV spectroscopic grade (Aldrich).

## Spectroscopic measurements

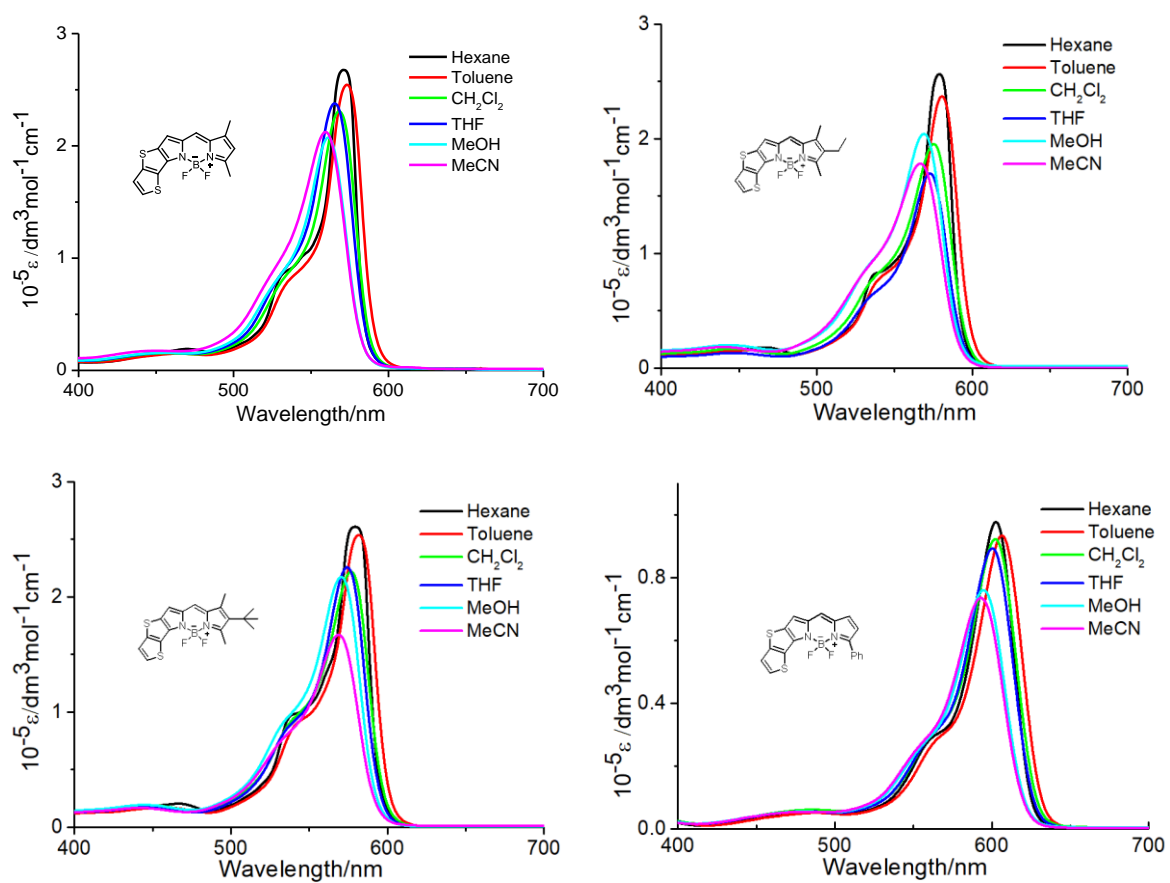

**Fig S1.** The absorption spectra of **4-7** in hexane, toluene,  $\text{CH}_2\text{Cl}_2$ , THF, MeOH, MeCN.

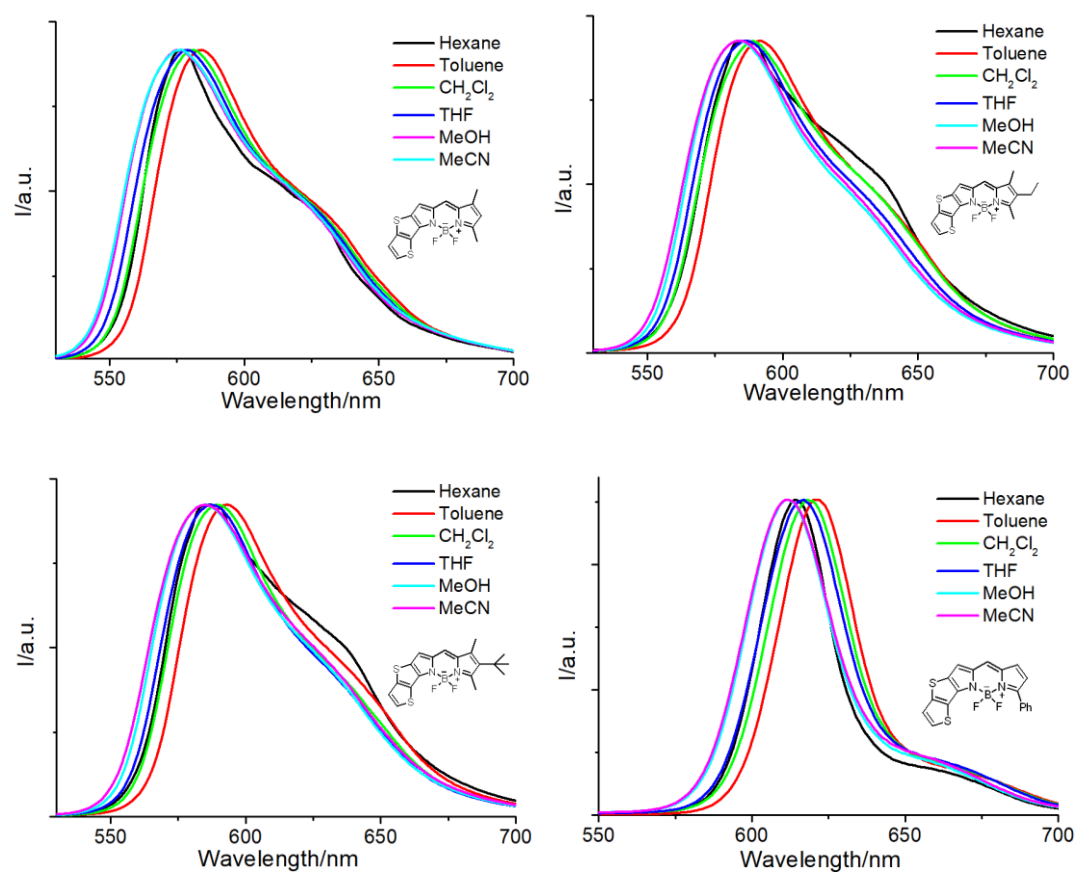

**Fig S2.** The emission spectra of **4-7** in hexane, toluene, CH<sub>2</sub>Cl<sub>2</sub>, THF, MeOH, MeCN

## Photostability

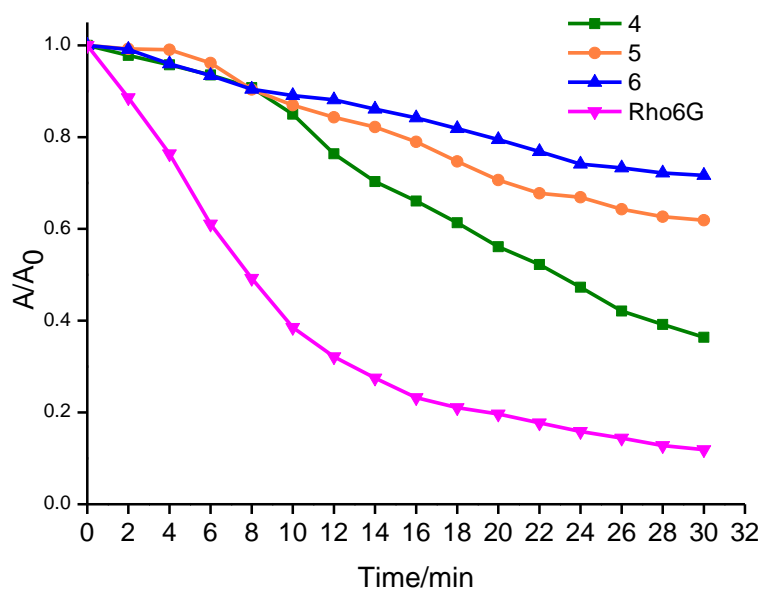

**Fig. S3** Photostability of **4-6** and Methylene Blue (MB) in dichloromethane at 2 min intervals determined using a laser beam (525 nm,  $1.5 \text{ W cm}^{-2}$ ) over an irradiation period of 30 min ( $c = 10^{-5} \text{ M}$ , 298 K).

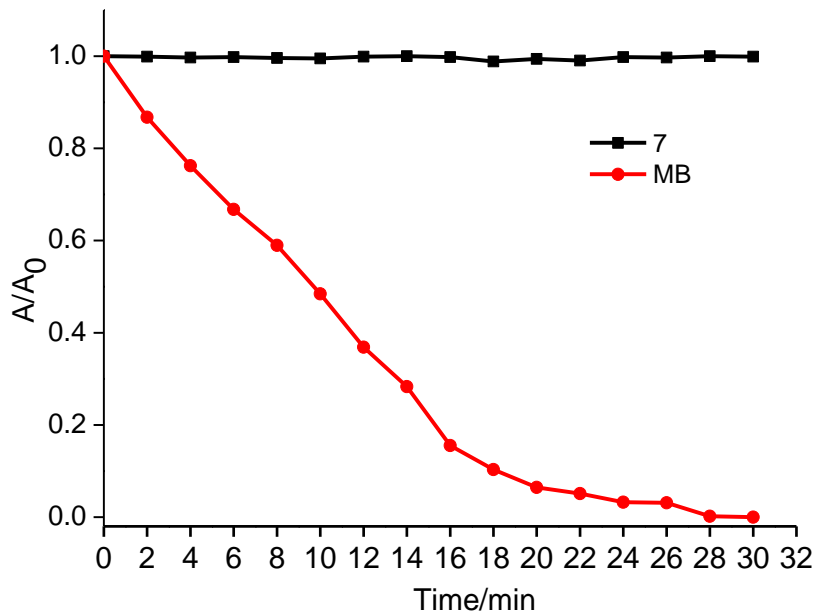

**Fig. S4** Photostability of **7** and Methylene Blue (MB) in dichloromethane at 2 min intervals determined using a laser beam (635 nm,  $660 \text{ mW cm}^{-2}$ ) over an irradiation period of 30 min ( $c = 10^{-5} \text{ M}$ , 298 K).

## The sensing properties of compounds **8**

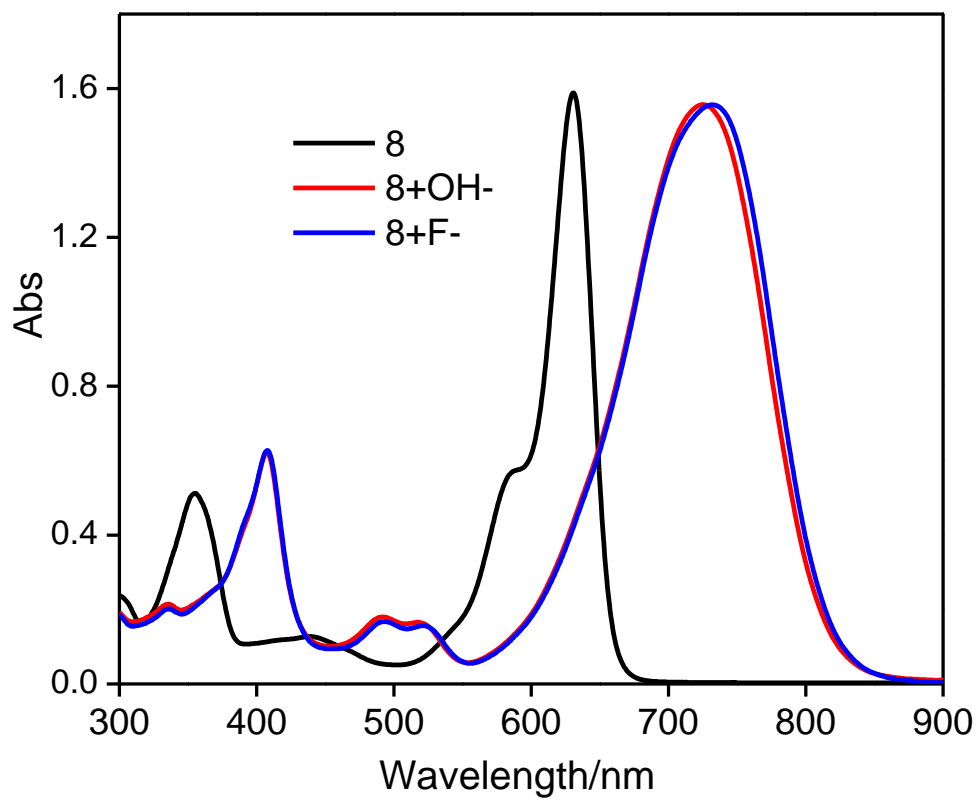

**Fig S5.** The absorption spectra of **8** (10 mM) in CH<sub>3</sub>CN after the addition of 20 eq. of OH<sup>-</sup> or F<sup>-</sup>

# $^1\text{H}$ and $^{13}\text{C}$ NMR spectra

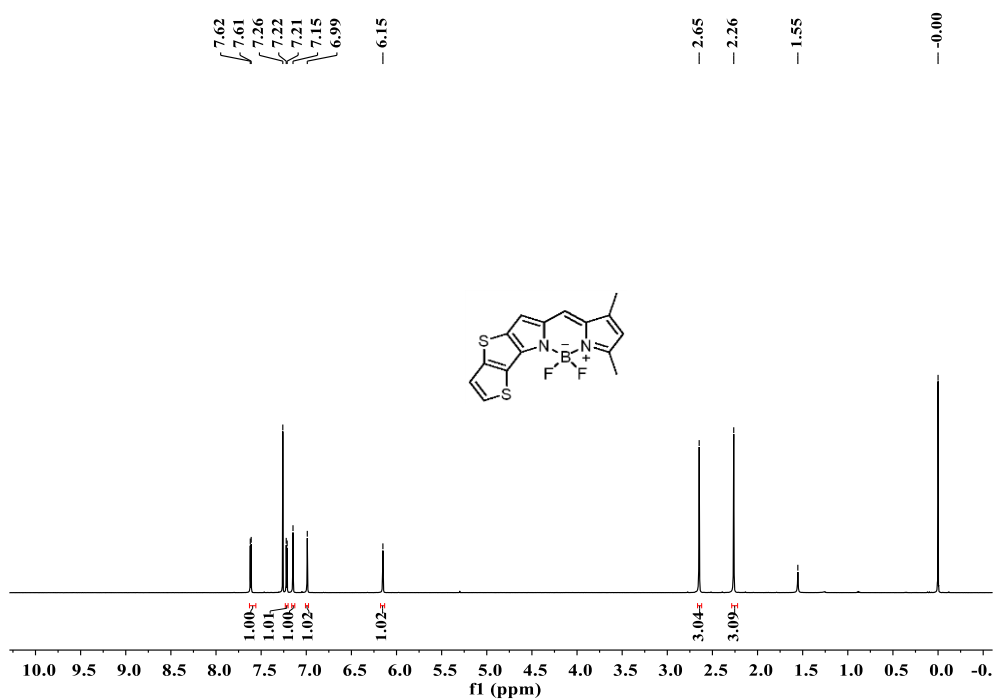

**Fig. S6**  $^1\text{H}$  NMR spectra of compound **4** recorded in  $\text{CDCl}_3$

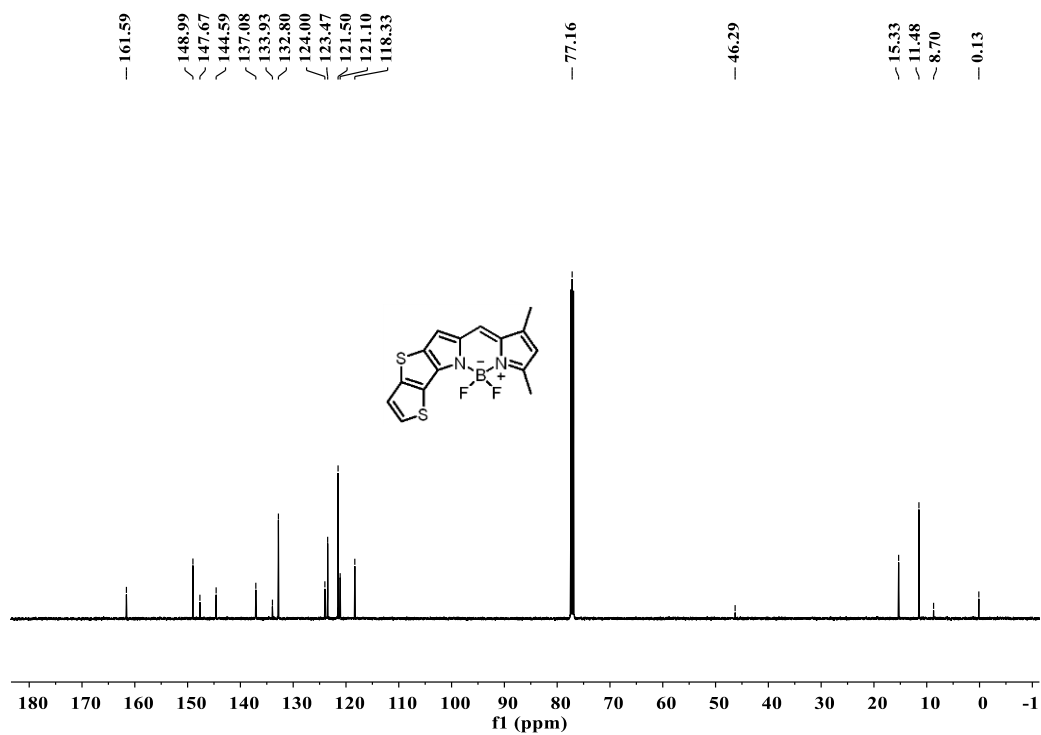

**Fig. S7**  $^{13}\text{C}$  NMR spectra of compound **4** recorded in  $\text{CDCl}_3$

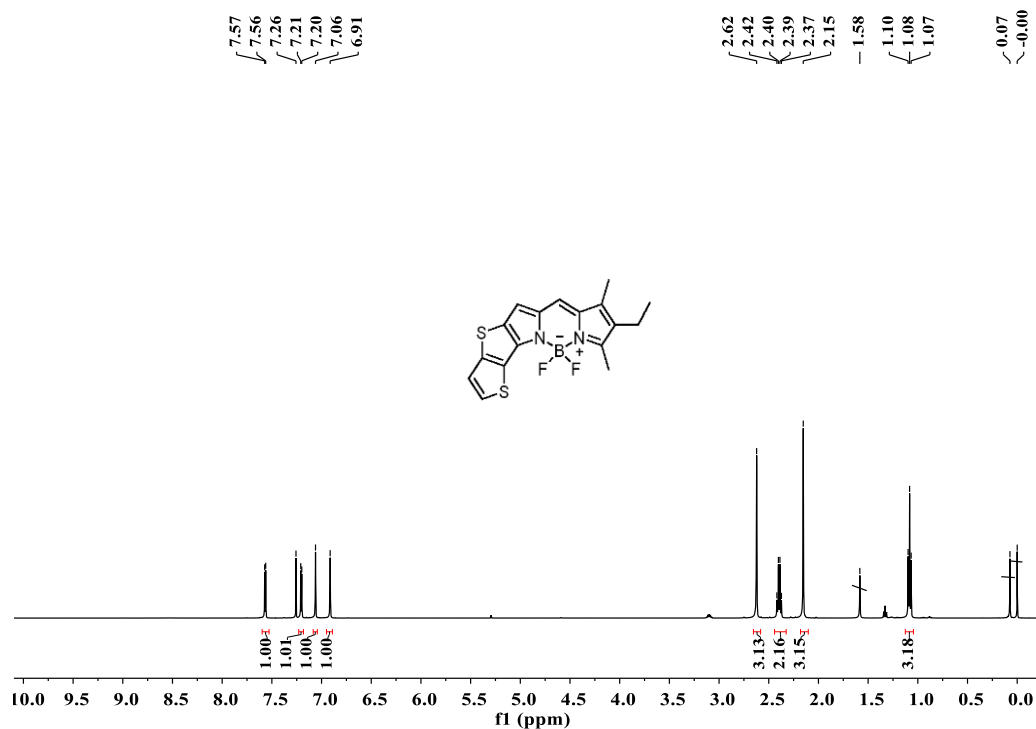

**Fig. S8** <sup>1</sup>H NMR spectra of compound **5** recorded in CDCl<sub>3</sub>

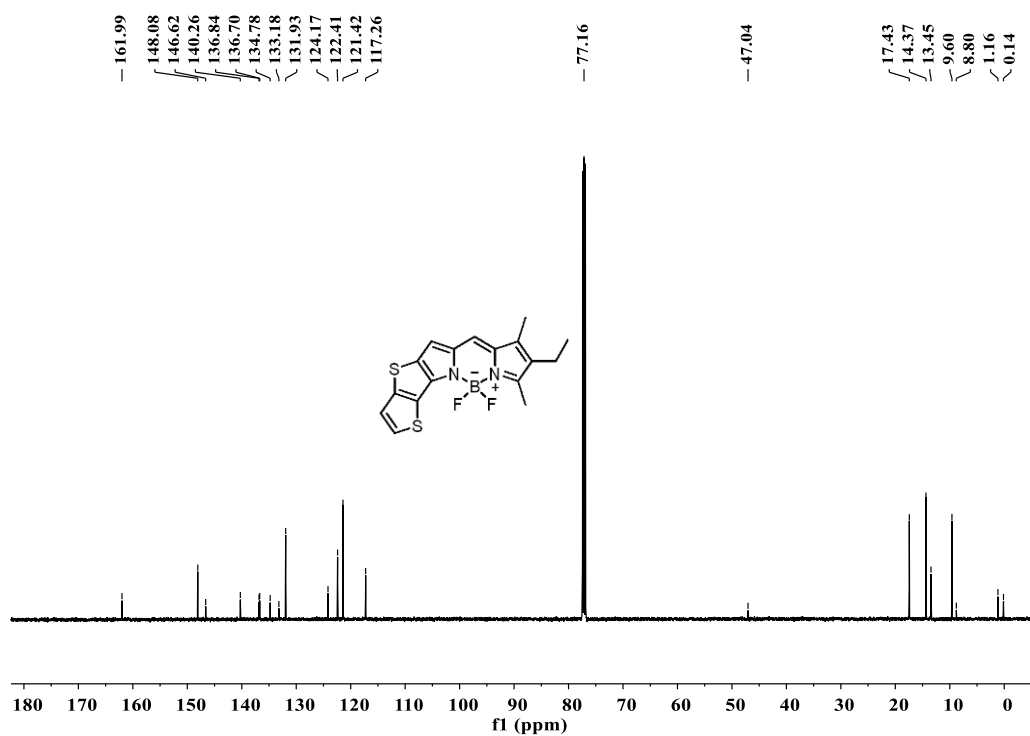

**Fig. S9** <sup>13</sup>C NMR spectra of compound **5** recorded in CDCl<sub>3</sub>





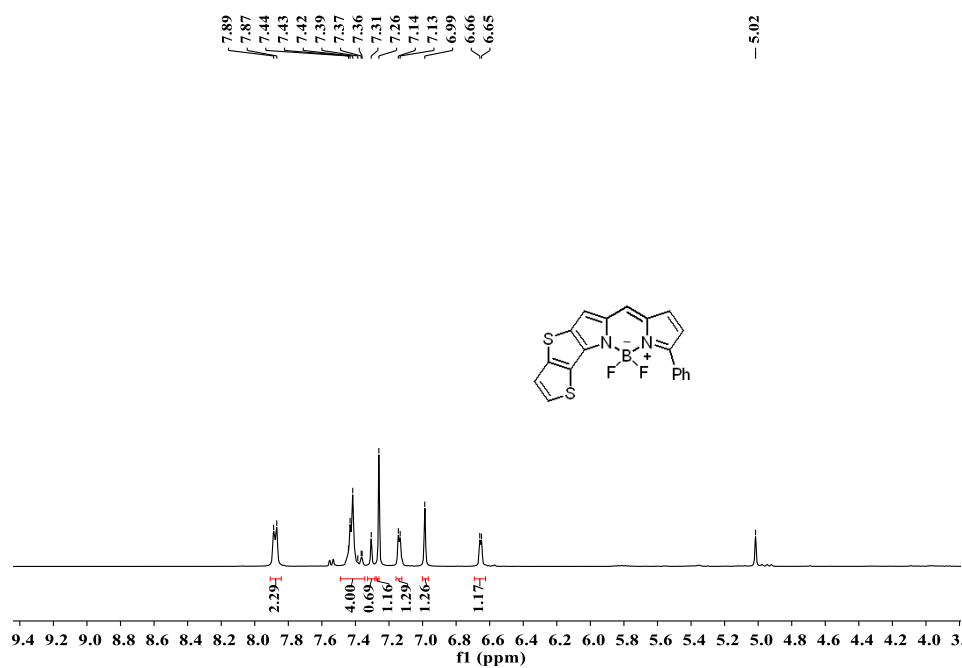

**Fig. S12** <sup>1</sup>H NMR spectra of compound **7** recorded in CDCl<sub>3</sub>

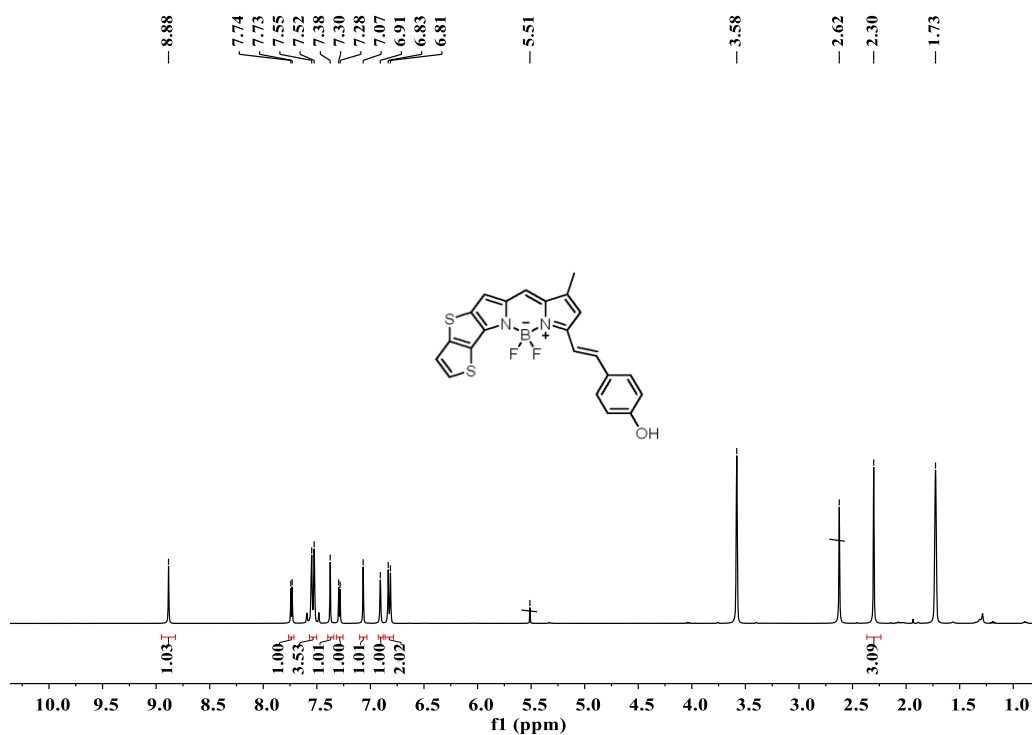

**Fig. S13** <sup>1</sup>H NMR spectra of compound **8** recorded in THF-*d*<sub>8</sub>

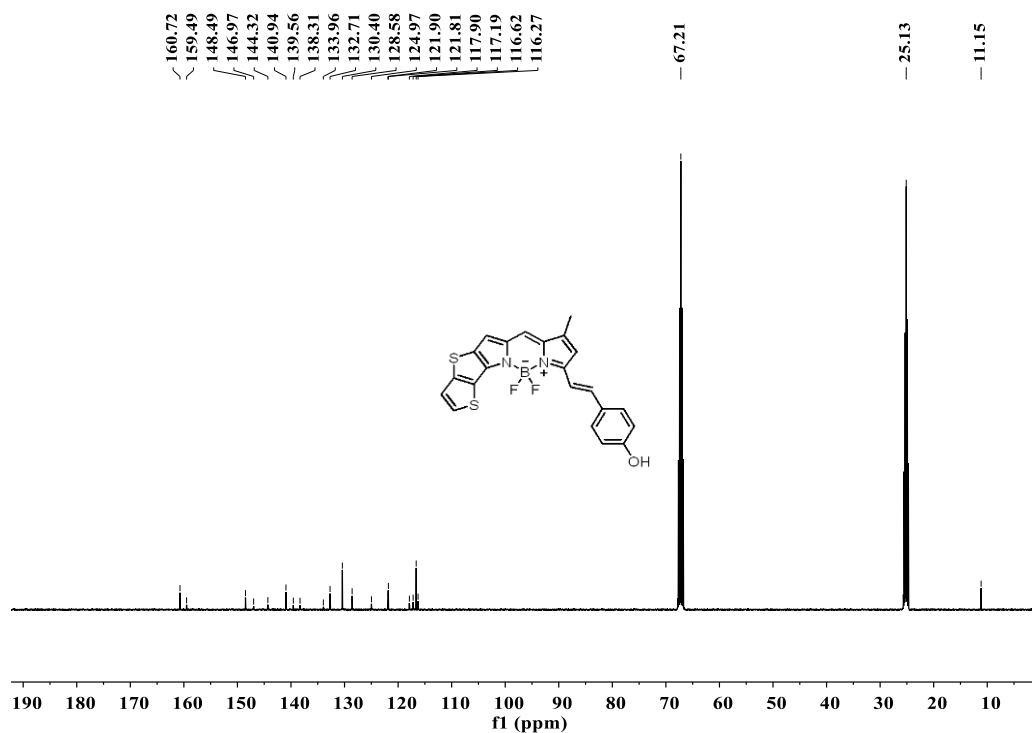

**Fig. S14** <sup>13</sup>C NMR spectra of compound **8** recorded in THF-*d*<sub>8</sub>

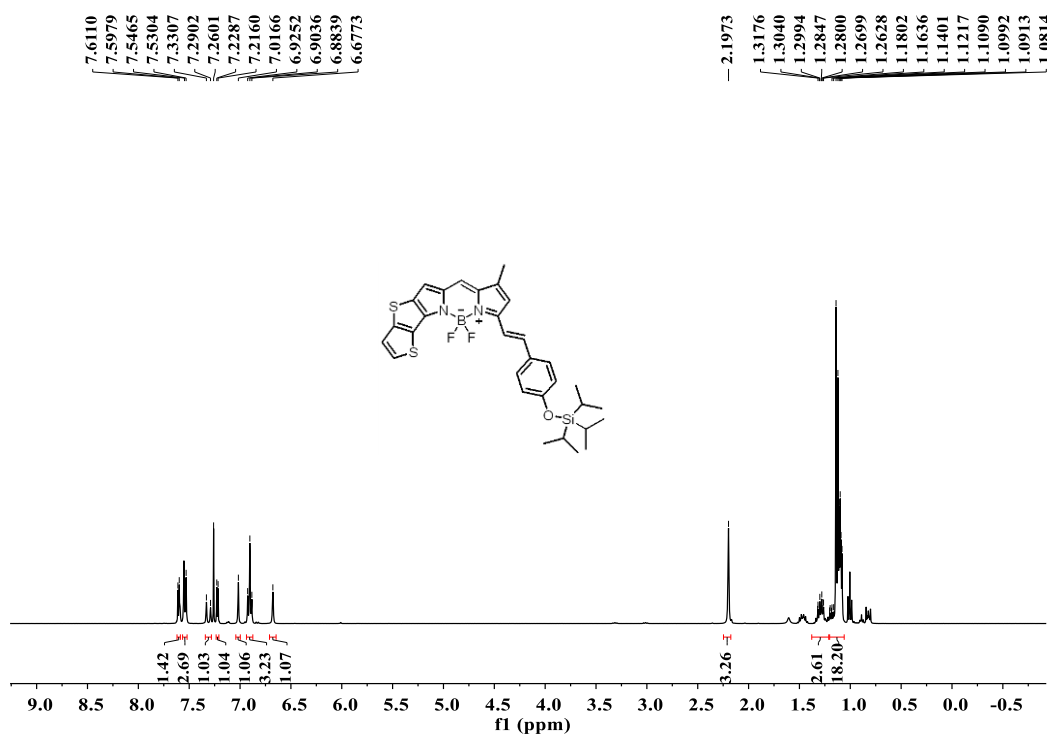

**Fig. S15** <sup>1</sup>H NMR spectra of compound **9** recorded in CDCl<sub>3</sub>

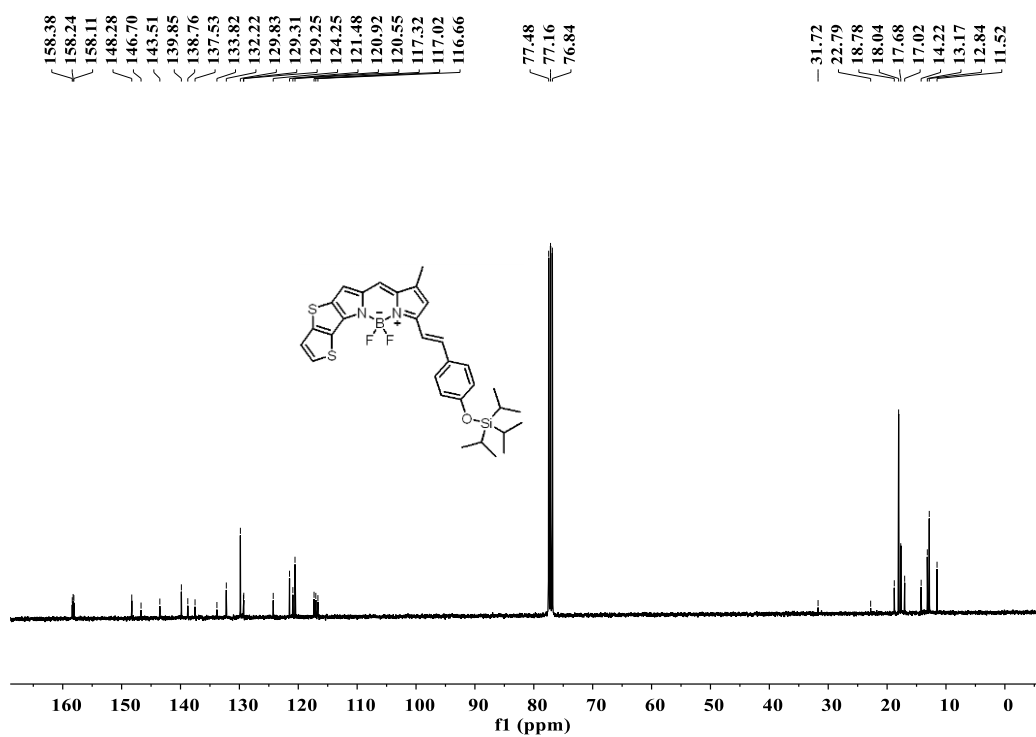

**Fig. S16** <sup>13</sup>C NMR spectra of compound **9** recorded in CDCl<sub>3</sub>

## HRMS-ESI spectra

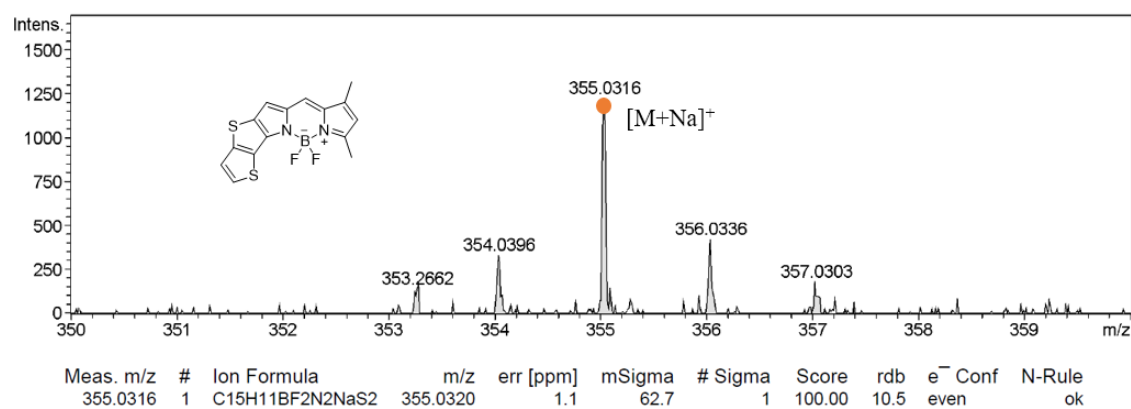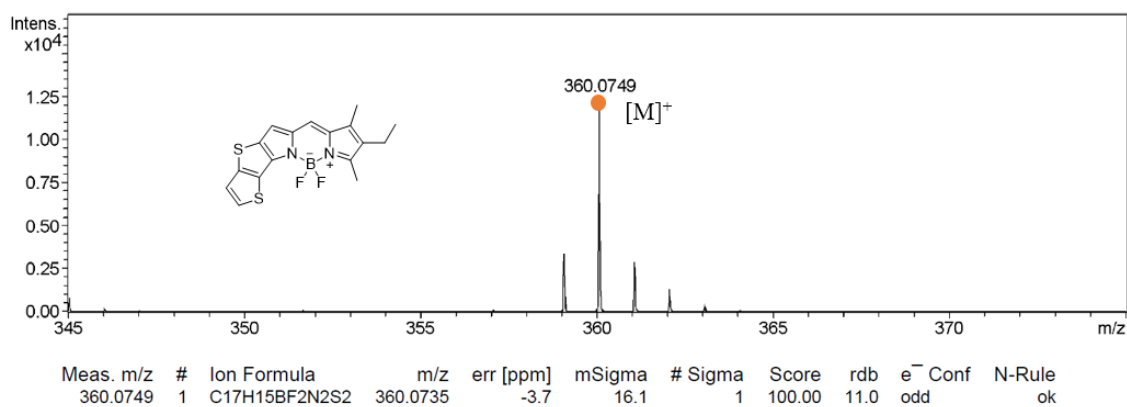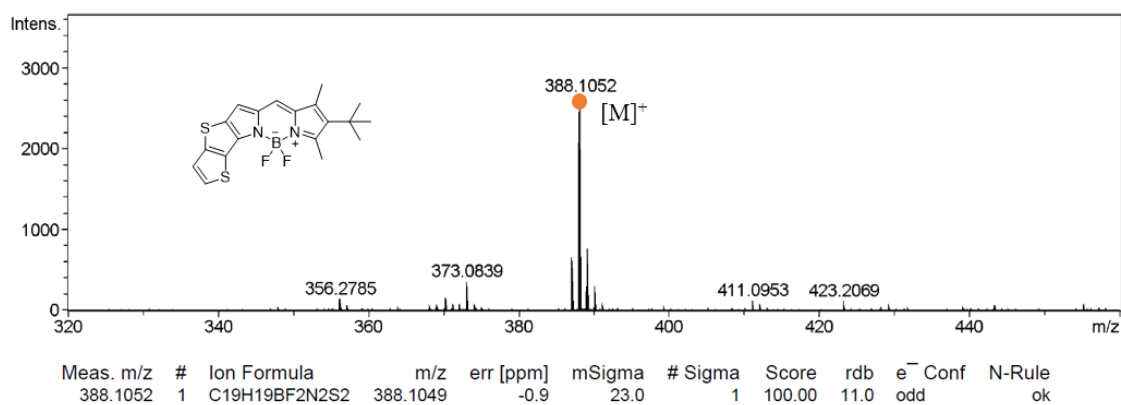

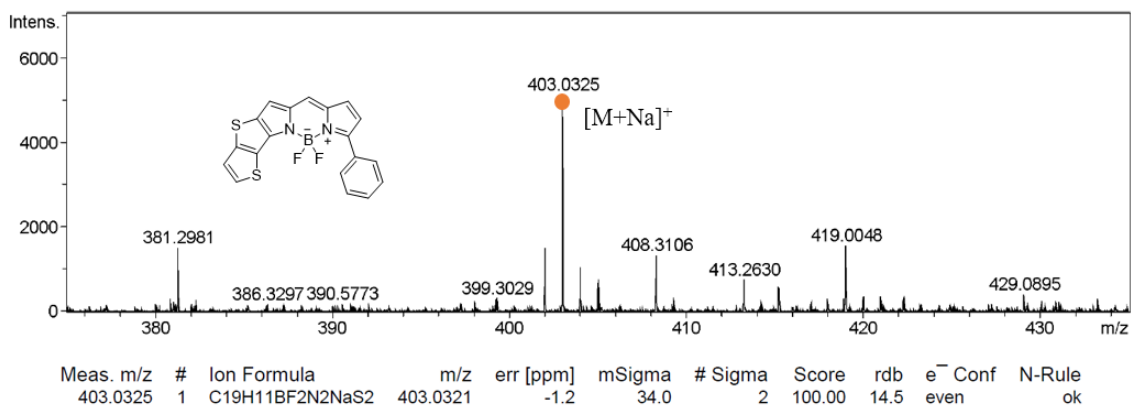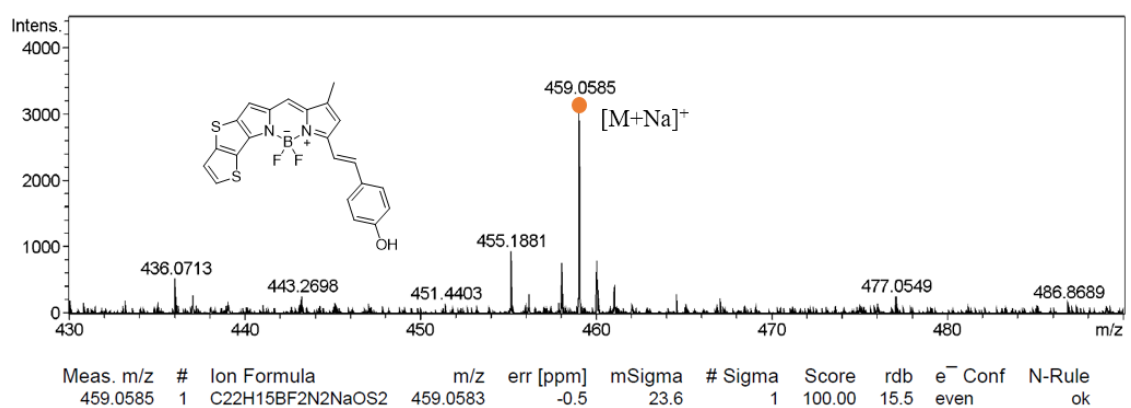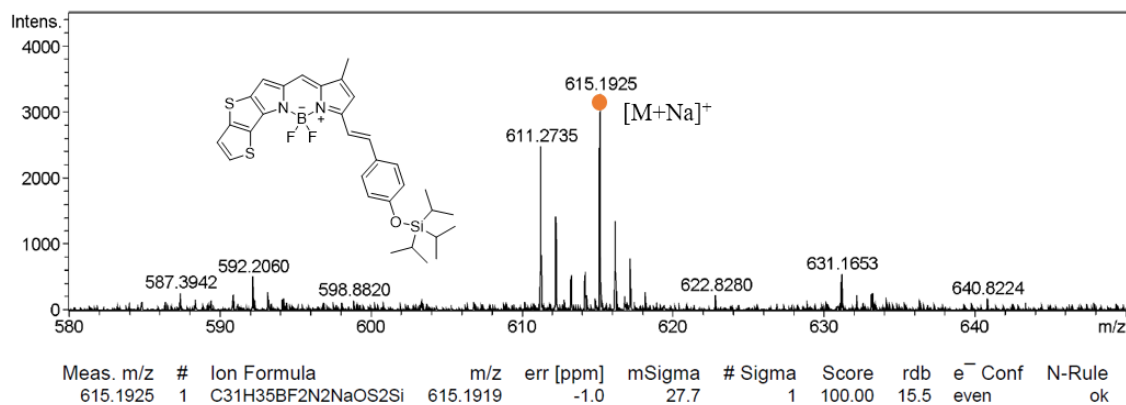

Supplement: c9qo01190k1.pdf [file c9qo01190k1.pdf]
